# Supplementary material for: Variability and Costs of Low-Value Preoperative Testing for Cataract Surgery Within the Veterans Health Administration
Source: PubMed Central journal article supplement (PMC8103225; doi:10.1001/jamanetworkopen.2021.7470), 2021-05-06
Supplement: jamanetwopen-e217470-s001.pdf [file jamanetwopen-e217470-s001.pdf]

## Supplemental Online Content

Mudumbai SC, Pershing S, Bowe T, et al. Variability and costs of low-value preoperative testing for cataract surgery within the Veterans Health Administration. *JAMA Netw Open*. 2021;4(5):e217470. doi:10.1001/jamanetworkopen.2021.7470

**eTable 1.** Noncataract Procedures That Were Considered to Have Justified Testing

**eTable 2.** Bivariate Analysis Describing the Association Between Patient, Surgery and Facility Characteristics, and Receipt of Any Preoperative Test Before Cataract Surgery in Fiscal Year 2017

**eTable 3.** Costs Per CPT Code for Laboratory Tests

**eTable 4.** Sensitivity Analysis: Mixed-Effects Logistic Regression Model for First Eye Surgery Describing the Association Between Patient, Surgery and Facility Characteristics, and Receipt of Any Preoperative Test Before Cataract Surgery in Fiscal Year 2017

**eTable 5.** Mixed-Effects Logistic Regression Model Describing the Association Between Patient, Surgery and Facility Characteristics, and Receipt of Preoperative Test Bundle Before Cataract Surgery in Fiscal Year 2017

**eTable 6.** Mixed-Effects Poisson Regression Model Describing the Association Between Patient, Surgery and Facility Characteristics, and Number of Preoperative Tests Before Cataract Surgery in Fiscal Year 2017

This supplemental material has been provided by the authors to give readers additional information about their work.

**eTable 1. Noncataract procedures that were considered to have justified testing. CPT=Current Procedural Terminology**

| CPT Code | CPT Name                     | CPT Description                                                                                                                                                                                                                                                                                                                                          |
|----------|------------------------------|----------------------------------------------------------------------------------------------------------------------------------------------------------------------------------------------------------------------------------------------------------------------------------------------------------------------------------------------------------|
| 10120    | REMOVE FOREIGN BODY          | INCISION AND REMOVAL OF FOREIGN BODY, SUBCUTANEOUS TISSUES; SIMPLE                                                                                                                                                                                                                                                                                       |
| 11042    | DEB SUBQ TISSUE 20 SQ CM/<   | DEBRIDEMENT, SUBCUTANEOUS TISSUE (INCLUDES EPIDERMIS AND DERMIS, IF PERFORMED); FIRST 20 SQ CM OR LESS                                                                                                                                                                                                                                                   |
| 12042    | INTMD RPR N-HF/GENIT2.6-7.5  | REPAIR, INTERMEDIATE, WOUNDS OF NECK, HANDS, FEET AND/OR EXTERNAL GENITALIA; 2.6 CM TO 7.5 CM                                                                                                                                                                                                                                                            |
| 12051    | INTMD RPR FACE/MM 2.5 CM/<   | REPAIR, INTERMEDIATE, WOUNDS OF FACE, EARS, EYELIDS, NOSE, LIPS AND/OR MUCOUS MEMBRANES; 2.5 CM OR LESS                                                                                                                                                                                                                                                  |
| 14040    | TIS TRNFR F/C/C/M/N/A/G/H/F  | ADJACENT TISSUE TRANSFER OR REARRANGEMENT, FOREHEAD, CHEEKS, CHIN, MOUTH, NECK, AXILLAE, GENITALIA, HANDS AND/OR FEET; DEFECT 10 SQ CM OR LESS                                                                                                                                                                                                           |
| 20680    | REMOVAL OF SUPPORT IMPLANT   | REMOVAL OF IMPLANT; DEEP (EG, BURIED WIRE, PIN, SCREW, METAL BAND, NAIL, ROD OR PLATE)                                                                                                                                                                                                                                                                   |
| 27187    | REINFORCE HIP BONES          | PROPHYLACTIC TREATMENT (NAILING, PINNING, PLATING OR WIRING) WITH OR WITHOUT METHYLMETHACRYLATE, FEMORAL NECK AND PROXIMAL FEMUR                                                                                                                                                                                                                         |
| 29580    | APPLICATION OF PASTE BOOT    | STRAPPING; UNNA BOOT                                                                                                                                                                                                                                                                                                                                     |
| 29822    | SHO ART HRS SRG LMTD DBRDMT  | ARTHROSCOPY, SHOULDER, SURGICAL; DEBRIDEMENT, LIMITED, 1 OR 2 DISCRETE STRUCTURES (EG, HUMERAL BONE, HUMERAL ARTICULAR CARTILAGE, GLENOID BONE, GLENOID ARTICULAR CARTILAGE, BICEPS TENDON, BICEPS ANCHOR COMPLEX, LABRUM, ARTICULAR CAPSULE, ARTICULAR SIDE OF THE ROTATOR CUFF, BURSAL SIDE OF THE ROTATOR CUFF, SUBACROMIAL BURSA, FOREIGN BODY[IES]) |
| 29824    | SHO ARTHRS SRG DSTL CLAVICLC | ARTHROSCOPY, SHOULDER, SURGICAL; DISTAL CLAVICULECTOMY INCLUDING DISTAL ARTICULAR SURFACE (MUMFORD PROCEDURE)                                                                                                                                                                                                                                            |
| 29826    | SHO ARTHRS SRG DECOMPRESSION | ARTHROSCOPY, SHOULDER, SURGICAL; DECOMPRESSION OF SUBACROMIAL SPACE WITH PARTIAL ACROMIOPLASTY, WITH CORACOACROMIAL LIGAMENT (IE, ARCH) RELEASE, WHEN PERFORMED (LIST SEPARATELY IN ADDITION TO CODE FOR PRIMARY PROCEDURE)                                                                                                                              |
| 30140    | RESECT INFERIOR TURBINATE    | SUBMUCOUS RESECTION INFERIOR TURBINATE, PARTIAL OR COMPLETE, ANY METHOD                                                                                                                                                                                                                                                                                  |
| 30520    | REPAIR OF NASAL SEPTUM       | SEPTOPLASTY OR SUBMUCOUS RESECTION, WITH OR WITHOUT CARTILAGE SCORING, CONTOURING OR REPLACEMENT WITH GRAFT                                                                                                                                                                                                                                              |
| 30901    | CONTROL OF NOSEBLEED         | CONTROL NASAL HEMORRHAGE, ANTERIOR, SIMPLE (LIMITED CAUTERY AND/OR PACKING) ANY METHOD                                                                                                                                                                                                                                                                   |
| 31231    | NASAL ENDOSCOPY DX           | NASAL ENDOSCOPY, DIAGNOSTIC, UNILATERAL OR BILATERAL (SEPARATE PROCEDURE)                                                                                                                                                                                                                                                                                |
| 31233    | NSL/SINS NDSC DX MAX SINUSC  | NASAL/SINUS ENDOSCOPY, DIAGNOSTIC; WITH MAXILLARY SINUSOSCOPY (VIA INFERIOR MEATUS OR CANINE FOSSA PUNCTURE)                                                                                                                                                                                                                                             |
| 31267    | ENDOSCOPY MAXILLARY SINUS    | NASAL/SINUS ENDOSCOPY, SURGICAL, WITH MAXILLARY ANTROSTOMY; WITH REMOVAL OF TISSUE FROM MAXILLARY SINUS                                                                                                                                                                                                                                                  |
| 31535    | LARYNGOSCOPY W/BIOPSY        | LARYNGOSCOPY, DIRECT, OPERATIVE, WITH BIOPSY;                                                                                                                                                                                                                                                                                                            |
| 31575    | DIAGNOSTIC LARYNGOSCOPY      | LARYNGOSCOPY, FLEXIBLE; DIAGNOSTIC                                                                                                                                                                                                                                                                                                                       |
| 31622    | DX BRONCHOSCOPE/WASH         | BRONCHOSCOPY, RIGID OR FLEXIBLE, INCLUDING FLUOROSCOPIC GUIDANCE, WHEN PERFORMED; DIAGNOSTIC, WITH CELL WASHING, WHEN PERFORMED (SEPARATE PROCEDURE)                                                                                                                                                                                                     |
| 31623    | DX BRONCHOSCOPE/BRUSH        | BRONCHOSCOPY, RIGID OR FLEXIBLE, INCLUDING FLUOROSCOPIC GUIDANCE, WHEN PERFORMED; WITH BRUSHING OR PROTECTED BRUSHINGS                                                                                                                                                                                                                                   |
| 31628    | BRONCHOSCOPY/LUNG BX EACH    | BRONCHOSCOPY, RIGID OR FLEXIBLE, INCLUDING FLUOROSCOPIC GUIDANCE, WHEN PERFORMED; WITH TRANSBRONCHIAL LUNG BIOPSY(S), SINGLE LOBE                                                                                                                                                                                                                        |

|       |                              |                                                                                                                                                                                                                                                                                                                                                                                                                                               |
|-------|------------------------------|-----------------------------------------------------------------------------------------------------------------------------------------------------------------------------------------------------------------------------------------------------------------------------------------------------------------------------------------------------------------------------------------------------------------------------------------------|
| 31652 | BRONCH EBUS SAMPLNG 1/2 NODE | BRONCHOSCOPY, RIGID OR FLEXIBLE, INCLUDING FLUOROSCOPIC GUIDANCE, WHEN PERFORMED; WITH ENDOBRONCHIAL ULTRASOUND (EBUS) GUIDED T RANSTRACHEAL AND/OR TRANSBRONCHIAL SAMPLING (EG, ASPIRATION[S]/BIOPSY[IIES]), ONE OR TWO MEDIASTINAL AND/OR HILAR LYMPH NODE STATIONS OR STRUCTURES                                                                                                                                                           |
| 32554 | ASPIRATE PLEURA W/O IMAGING  | THORACENTESIS, NEEDLE OR CATHETER, ASPIRATION OF THE PLEURAL SPACE; WITHOUT IMAGING GUIDANCE                                                                                                                                                                                                                                                                                                                                                  |
| 33213 | INSERT PULSE GEN DUAL LEADS  | INSERTION OF PACEMAKER PULSE GENERATOR ONLY; WITH EXISTING DUAL LEADS                                                                                                                                                                                                                                                                                                                                                                         |
| 33216 | INSERT 1 ELECTRODE PM-DEFIB  | INSERTION OF A SINGLE TRANSVENOUS ELECTRODE, PERMANENT PACEMAKER OR IMPLANTABLE DEFIBRILLATOR                                                                                                                                                                                                                                                                                                                                                 |
| 35301 | RECHANNELING OF ARTERY       | THROMBOENDARTERECTOMY, INCLUDING PATCH GRAFT, IF PERFORMED; CAROTID, VERTEBRAL, SUBCLAVIAN, BY NECK INCISION                                                                                                                                                                                                                                                                                                                                  |
| 36147 | ACCESS AV DIAL GRFT FOR EVAL | INTRODUCTION OF NEEDLE AND/OR CATHETER, ARTERIOVENOUS SHUNT CREATED FOR DIALYSIS (GRAFT/FISTULA); INITIAL ACCESS WITH COMPLETE RADIOLOGICAL EVALUATION OF DIALYSIS ACCESS, INCLUDING FLUOROSCOPY, IMAGE DOCUMENTATION AND REPORT (INCLUDES ACCESS OF SHUNT, INJECTION[S] OF CONTRAST, AND ALL NECESSARY IMAGING FROM THE ARTERIAL ANASTOMOSIS AND ADJACENT ARTERY THROUGH ENTIRE VENOUS OUTFLOW INCLUDING THE INFERIOR OR SUPERIOR VENA CAVA) |
| 36223 | PLACE CATH CAROTID/INOM ART  | SELECTIVE CATHETER PLACEMENT, COMMON CAROTID OR INNOMINATE ARTERY, UNILATERAL, ANY APPROACH, WITH ANGIOGRAPHY OF THE IPSILATERAL INTRACRANIAL CAROTID CIRCULATION AND ALL ASSOCIATED RADIOLOGICAL SUPERVISION AND INTERPRETATION, INCLUDES ANGIOGRAPHY OF THE EXTRACRANIAL CAROTID AND CERVICOCEREBRAL ARCH, WHEN PERFORMED                                                                                                                   |
| 36224 | PLACE CATH CAROTD ART        | SELECTIVE CATHETER PLACEMENT, INTERNAL CAROTID ARTERY, UNILATERAL, WITH ANGIOGRAPHY OF THE IPSILATERAL INTRACRANIAL CAROTID CIRCULATION AND ALL ASSOCIATED RADIOLOGICAL SUPERVISION AND INTERPRETATION, INCLUDES ANGIOGRAPHY OF THE EXTRACRANIAL CAROTID AND CERVICOCEREBRAL ARCH, WHEN PERFORMED                                                                                                                                             |
| 36225 | PLACE CATH SUBCLAVIAN ART    | SELECTIVE CATHETER PLACEMENT, SUBCLAVIAN OR INNOMINATE ARTERY, UNILATERAL, WITH ANGIOGRAPHY OF THE IPSILATERAL VERTEBRAL CIRCULATION AND ALL ASSOCIATED RADIOLOGICAL SUPERVISION AND INTERPRETATION, INCLUDES ANGIOGRAPHY OF THE CERVICOCEREBRAL ARCH, WHEN PERFORMED                                                                                                                                                                         |
| 36226 | PLACE CATH VERTEBRAL ART     | SELECTIVE CATHETER PLACEMENT, VERTEBRAL ARTERY, UNILATERAL, WITH ANGIOGRAPHY OF THE IPSILATERAL VERTEBRAL CIRCULATION AND ALL ASSOCIATED RADIOLOGICAL SUPERVISION AND INTERPRETATION, INCLUDES ANGIOGRAPHY OF THE CERVICOCEREBRAL ARCH, WHEN PERFORMED                                                                                                                                                                                        |
| 36227 | PLACE CATH XTRNL CAROTID     | SELECTIVE CATHETER PLACEMENT, EXTERNAL CAROTID ARTERY, UNILATERAL, WITH ANGIOGRAPHY OF THE IPSILATERAL EXTERNAL CAROTID CIRCULATION AND ALL ASSOCIATED RADIOLOGICAL SUPERVISION AND INTERPRETATION (LIST SEPARATELY IN ADDITION TO CODE FOR PRIMARY PROCEDURE)                                                                                                                                                                                |
| 36245 | INS CATH ABD/L-EXT ART 1ST   | SELECTIVE CATHETER PLACEMENT, ARTERIAL SYSTEM; EACH FIRST ORDER ABDOMINAL, PELVIC, OR LOWER EXTREMITY ARTERY BRANCH, WITHIN A VASCULAR FAMILY                                                                                                                                                                                                                                                                                                 |
| 36556 | INSERT NON-TUNNEL CV CATH    | INSERTION OF NON-TUNNELED CENTRALLY INSERTED CENTRAL VENOUS CATHETER; AGE 5 YEARS OR OLDER                                                                                                                                                                                                                                                                                                                                                    |
| 36558 | INSERT TUNNELED CV CATH      | INSERTION OF TUNNELED CENTRALLY INSERTED CENTRAL VENOUS CATHETER, WITHOUT SUBCUTANEOUS PORT OR PUMP; AGE 5 YEARS OR OLDER                                                                                                                                                                                                                                                                                                                     |
| 36561 | INSERT TUNNELED CV CATH      | INSERTION OF TUNNELED CENTRALLY INSERTED CENTRAL VENOUS ACCESS DEVICE, WITH SUBCUTANEOUS PORT; AGE 5 YEARS OR OLDER                                                                                                                                                                                                                                                                                                                           |
| 36571 | INSERT PICVAD CATH           | INSERTION OF PERIPHERALLY INSERTED CENTRAL VENOUS ACCESS DEVICE, WITH SUBCUTANEOUS PORT; AGE 5 YEARS OR OLDER                                                                                                                                                                                                                                                                                                                                 |
| 36589 | REMOVAL TUNNELED CV CATH     | REMOVAL OF TUNNELED CENTRAL VENOUS CATHETER, WITHOUT SUBCUTANEOUS PORT OR PUMP                                                                                                                                                                                                                                                                                                                                                                |

|       |                              |                                                                                                                                                                                                                                                                                                                                                                                                                                                                       |
|-------|------------------------------|-----------------------------------------------------------------------------------------------------------------------------------------------------------------------------------------------------------------------------------------------------------------------------------------------------------------------------------------------------------------------------------------------------------------------------------------------------------------------|
| 36901 | INTRO CATH DIALYSIS CIRCUIT  | INTRODUCTION OF NEEDLE(S) AND/OR CATHETER(S), DIALYSIS CIRCUIT, WITH DIAGNOSTIC ANGIOGRAPHY OF THE DIALYSIS CIRCUIT, INCLUDING ALL DIRECT PUNCTURE(S) AND CATHETER PLACEMENT(S), INJECTION(S) OF CONTRAST, ALL NECESSARY IMAGING FROM THE ARTERIAL ANASTOMOSIS AND ADJACENT ARTERY THROUGH ENTIRE VENOUS OUTFLOW INCLUDING THE INFERIOR OR SUPERIOR VENA CAVA, FLUOROSCOPIC GUIDANCE, RADIOLOGICAL SUPERVISION AND INTERPRETATION AND IMAGE DOCUMENTATION AND REPORT; |
| 37224 | FEM/POPL REVAS W/TLA         | REVASCLARIZATION, ENDOVASCULAR, OPEN OR PERCUTANEOUS, FEMORAL, POPLITEAL ARTERY(S), UNILATERAL; WITH TRANSLUMINAL ANGIOPLASTY                                                                                                                                                                                                                                                                                                                                         |
| 37607 | LIGATION OF A-V FISTULA      | LIGATION OR BANDING OF ANGIOACCESS ARTERIOVENOUS FISTULA                                                                                                                                                                                                                                                                                                                                                                                                              |
| 38505 | NEEDLE BIOPSY LYMPH NODES    | BIOPSY OR EXCISION OF LYMPH NODE(S); BY NEEDLE, SUPERFICIAL (EG, CERVICAL, INGUINAL, AXILLARY)                                                                                                                                                                                                                                                                                                                                                                        |
| 4052F | HEMODIALYSIS VIA AV FISTULA  | HEMODIALYSIS VIA FUNCTIONING ARTERIOVENOUS (AV) FISTULA (ESRD)                                                                                                                                                                                                                                                                                                                                                                                                        |
| 4053F | HEMODIALYSIS VIA AV GRAFT    | HEMODIALYSIS VIA FUNCTIONING ARTERIOVENOUS (AV) GRAFT (ESRD)                                                                                                                                                                                                                                                                                                                                                                                                          |
| 4054F | HEMODIALYSIS VIA CATHETER    | HEMODIALYSIS VIA CATHETER (ESRD)                                                                                                                                                                                                                                                                                                                                                                                                                                      |
| 43200 | ESOPHAGOSCOPY FLEXIBLE BRUSH | ESOPHAGOSCOPY, FLEXIBLE, TRANSORAL; DIAGNOSTIC, INCLUDING COLLECTION OF SPECIMEN(S) BY BRUSHING OR WASHING, WHEN PERFORMED (SEPARATE PROCEDURE)                                                                                                                                                                                                                                                                                                                       |
| 43229 | ESOPHAGOSCOPY LESION ABLATE  | ESOPHAGOSCOPY, FLEXIBLE, TRANSORAL; WITH ABLATION OF TUMOR(S), POLYP(S), OR OTHER LESION(S) (INCLUDES PRE- AND POST-DILATION AND GUIDE WIRE PASSAGE, WHEN PERFORMED)                                                                                                                                                                                                                                                                                                  |
| 43235 | EGD DIAGNOSTIC BRUSH WASH    | ESOPHAGOGASTRODUODENOSCOPY, FLEXIBLE, TRANSORAL; DIAGNOSTIC, INCLUDING COLLECTION OF SPECIMEN(S) BY BRUSHING OR WASHING, WHEN PERFORMED (SEPARATE PROCEDURE)                                                                                                                                                                                                                                                                                                          |
| 43239 | EGD BIOPSY SINGLE/MULTIPLE   | ESOPHAGOGASTRODUODENOSCOPY, FLEXIBLE, TRANSORAL; WITH BIOPSY, SINGLE OR MULTIPLE                                                                                                                                                                                                                                                                                                                                                                                      |
| 43248 | EGD GUIDE WIRE INSERTION     | ESOPHAGOGASTRODUODENOSCOPY, FLEXIBLE, TRANSORAL; WITH INSERTION OF GUIDE WIRE FOLLOWED BY PASSAGE OF DILATOR(S) THROUGH ESOPHAGUS OVER GUIDE WIRE                                                                                                                                                                                                                                                                                                                     |
| 43255 | EGD CONTROL BLEEDING ANY     | ESOPHAGOGASTRODUODENOSCOPY, FLEXIBLE, TRANSORAL; WITH CONTROL OF BLEEDING, ANY METHOD                                                                                                                                                                                                                                                                                                                                                                                 |
| 43265 | ERCPC LITHOTRIPSY CALCULI    | ENDOSCOPIC RETROGRADE CHOLANGIOPANCREATOGRAPHY (ERCPC); WITH DESTRUCTION OF CALCULI, ANY METHOD (EG, MECHANICAL, ELECTROHYDRAULIC, LITHOTRIPSY)                                                                                                                                                                                                                                                                                                                       |
| 43277 | ERCPC EA DUCT/AMPULLA DILATE | ENDOSCOPIC RETROGRADE CHOLANGIOPANCREATOGRAPHY (ERCPC); WITH TRANS-ENDOSCOPIC BALLOON DILATION OF BILIARY/PANCREATIC DUCT(S) OR OF AMPULLA (SPHINCTEROPLASTY), INCLUDING SPHINCTEROTOMY, WHEN PERFORMED, EACH DUCT                                                                                                                                                                                                                                                    |
| 43281 | LAP PARAESOPHAG HERN REPAIR  | LAPAROSCOPY, SURGICAL, REPAIR OF PARAESOPHAGEAL HERNIA, INCLUDES FUNDOPLASTY, WHEN PERFORMED; WITHOUT IMPLANTATION OF MESH                                                                                                                                                                                                                                                                                                                                            |
| 44140 | PARTIAL REMOVAL OF COLON     | COLECTOMY, PARTIAL; WITH ANASTOMOSIS                                                                                                                                                                                                                                                                                                                                                                                                                                  |
| 44950 | APPENDECTOMY                 | APPENDECTOMY;                                                                                                                                                                                                                                                                                                                                                                                                                                                         |
| 44955 | APPENDECTOMY ADD-ON          | APPENDECTOMY; WHEN DONE FOR INDICATED PURPOSE AT TIME OF OTHER MAJOR PROCEDURE (NOT AS SEPARATE PROCEDURE) (LIST SEPARATELY IN ADDITION TO CODE FOR PRIMARY PROCEDURE)                                                                                                                                                                                                                                                                                                |
| 49082 | ABD PARACENTESIS             | ABDOMINAL PARACENTESIS (DIAGNOSTIC OR THERAPEUTIC); WITHOUT IMAGING GUIDANCE                                                                                                                                                                                                                                                                                                                                                                                          |
| 49652 | LAP VENT/ABD HERNIA REPAIR   | LAPAROSCOPY, SURGICAL, REPAIR, VENTRAL, UMBILICAL, SPIGELIAN OR EPIGASTRIC HERNIA (INCLUDES MESH INSERTION, WHEN PERFORMED); REDUCIBLE                                                                                                                                                                                                                                                                                                                                |
| 50200 | RENAL BIOPSY PERQ            | RENAL BIOPSY; PERCUTANEOUS, BY TROCAR OR NEEDLE                                                                                                                                                                                                                                                                                                                                                                                                                       |
| 51700 | IRRIGATION OF BLADDER        | BLADDER IRRIGATION, SIMPLE, LAVAGE AND/OR INSTILLATION                                                                                                                                                                                                                                                                                                                                                                                                                |

|       |                             |                                                                                                                                                                                                                                                                                                                                                                                                                                    |
|-------|-----------------------------|------------------------------------------------------------------------------------------------------------------------------------------------------------------------------------------------------------------------------------------------------------------------------------------------------------------------------------------------------------------------------------------------------------------------------------|
| 51705 | CHANGE OF BLADDER TUBE      | CHANGE OF CYSTOSTOMY TUBE; SIMPLE                                                                                                                                                                                                                                                                                                                                                                                                  |
| 51720 | TREATMENT OF BLADDER LESION | BLADDER INSTILLATION OF ANTICARCINOGENIC AGENT (INCLUDING RETENTION TIME)                                                                                                                                                                                                                                                                                                                                                          |
| 52000 | CYSTOSCOPY                  | CYSTOURETHROSCOPY (SEPARATE PROCEDURE)                                                                                                                                                                                                                                                                                                                                                                                             |
| 52234 | CYSTOSCOPY AND TREATMENT    | CYSTOURETHROSCOPY, WITH FULGURATION (INCLUDING CRYOSURGERY OR LASER SURGERY) AND/OR RESECTION OF; SMALL BLADDER TUMOR(S) (0.5 UP TO 2.0 CM)                                                                                                                                                                                                                                                                                        |
| 52332 | CYSTOSCOPY AND TREATMENT    | CYSTOURETHROSCOPY, WITH INSERTION OF INDWELLING URETERAL STENT (EG, GIBBONS OR DOUBLE-J TYPE)                                                                                                                                                                                                                                                                                                                                      |
| 52356 | CYTO/URETERO W/LITHOTRIPSY  | CYSTOURETHROSCOPY, WITH URETEROSCOPY AND/OR PYELOSCOPY; WITH LITHOTRIPSY INCLUDING INSERTION OF INDWELLING URETERAL STENT (EG, GIBBONS OR DOUBLE-J TYPE)                                                                                                                                                                                                                                                                           |
| 52601 | PROSTATECTOMY (TURP)        | TRANSURETHRAL ELECTROSURGICAL RESECTION OF PROSTATE, INCLUDING CONTROL OF POSTOPERATIVE BLEEDING, COMPLETE (VASECTOMY, MEATOTOMY, CYSTOURETHROSCOPY, URETHRAL CALIBRATION AND/OR DILATION, AND INTERNAL URETHROTOMY ARE INCLUDED)                                                                                                                                                                                                  |
| 54235 | PENILE INJECTION            | INJECTION OF CORPORA CAVERNOSA WITH PHARMACOLOGIC AGENT(S) (EG, PAPAVERINE, PHENTOLAMINE)                                                                                                                                                                                                                                                                                                                                          |
| 62311 | INJECT SPINE L/S (CD)       | INJECTION(S), OF DIAGNOSTIC OR THERAPEUTIC SUBSTANCE(S) (INCLUDING ANESTHETIC, ANTISPASMODIC, OPIOID, STEROID, OTHER SOLUTION), NOT INCLUDING NEUROLYTIC SUBSTANCES, INCLUDING NEEDLE OR CATHETER PLACEMENT, INCLUDES CONTRAST FOR LOCALIZATION WHEN PERFORMED, EPIDURAL OR SUBARACHNOID; LUMBAR OR SACRAL (CAUDAL)                                                                                                                |
| 62323 | NJX INTERLAMINAR LMBR/SAC   | INJECTION(S), OF DIAGNOSTIC OR THERAPEUTIC SUBSTANCE(S) (EG, ANESTHETIC, ANTISPASMODIC, OPIOID, STEROID, OTHER SOLUTION), NOT INCLUDING NEUROLYTIC SUBSTANCES, INCLUDING NEEDLE OR CATHETER PLACEMENT, INTERLAMINAR EPIDURAL OR SUBARACHNOID, LUMBAR OR SACRAL (CAUDAL); WITH IMAGING GUIDANCE (IE, FLUOROSCOPY OR CT)                                                                                                             |
| 66179 | AQUEOUS SHUNT EYE W/O GRAFT | AQUEOUS SHUNT TO EXTRAOCULAR EQUATORIAL PLATE RESERVOIR, EXTERNAL APPROACH; WITHOUT GRAFT                                                                                                                                                                                                                                                                                                                                          |
| 66840 | REMOVAL OF LENS MATERIAL    | REMOVAL OF LENS MATERIAL; ASPIRATION TECHNIQUE, 1 OR MORE STAGES                                                                                                                                                                                                                                                                                                                                                                   |
| 66850 | REMOVAL OF LENS MATERIAL    | REMOVAL OF LENS MATERIAL; PHACOFRAGMENTATION TECHNIQUE (MECHANICAL OR ULTRASONIC) (EG, PHACOEMULSIFICATION), WITH ASPIRATION                                                                                                                                                                                                                                                                                                       |
| 66852 | REMOVAL OF LENS MATERIAL    | REMOVAL OF LENS MATERIAL; PARS PLANA APPROACH, WITH OR WITHOUT VITRECTOMY                                                                                                                                                                                                                                                                                                                                                          |
| 66986 | EXCHANGE LENS PROSTHESIS    | EXCHANGE OF INTRAOCULAR LENS                                                                                                                                                                                                                                                                                                                                                                                                       |
| 66999 | EYE SURGERY PROCEDURE       | UNLISTED PROCEDURE, ANTERIOR SEGMENT OF EYE                                                                                                                                                                                                                                                                                                                                                                                        |
| 67028 | INJECTION EYE DRUG          | INTRAVITREAL INJECTION OF A PHARMACOLOGIC AGENT (SEPARATE PROCEDURE)                                                                                                                                                                                                                                                                                                                                                               |
| 67042 | VIT FOR MACULAR HOLE        | VITRECTOMY, MECHANICAL, PARS PLANA APPROACH; WITH REMOVAL OF INTERNAL LIMITING MEMBRANE OF RETINA (EG, FOR REPAIR OF MACULAR HOLE, DIABETIC MACULAR EDEMA), INCLUDES, IF PERFORMED, INTRAOCULAR TAMPONADE (IE, AIR, GAS OR SILICONE OIL)                                                                                                                                                                                           |
| 67108 | REPAIR DETACHED RETINA      | REPAIR OF RETINAL DETACHMENT; WITH VITRECTOMY, ANY METHOD, INCLUDING, WHEN PERFORMED, AIR OR GAS TAMPONADE, FOCAL ENDOLASER PHOTOCOAGULATION, CRYOTHERAPY, DRAINAGE OF SUBRETINAL FLUID, SCLERAL BUCKLING, AND/OR REMOVAL OF LENS BY SAME TECHNIQUE                                                                                                                                                                                |
| 67113 | REPAIR RETINAL DETACH CPLX  | REPAIR OF COMPLEX RETINAL DETACHMENT (EG, PROLIFERATIVE VITREORETINOPATHY, STAGE C-1 OR GREATER, DIABETIC TRACTION RETINAL DETACHMENT, RETINOPATHY OF PREMATURITY, RETINAL TEAR OF GREATER THAN 90 DEGREES), WITH VITRECTOMY AND MEMBRANE PEELING, INCLUDING, WHEN PERFORMED, AIR, GAS, OR SILICONE OIL TAMPONADE, CRYOTHERAPY, ENDOLASER PHOTOCOAGULATION, DRAINAGE OF SUBRETINAL FLUID, SCLERAL BUCKLING, AND/OR REMOVAL OF LENS |
| 67145 | TREATMENT OF RETINA         | PROPHYLAXIS OF RETINAL DETACHMENT (EG, RETINAL BREAK, LATTICE DEGENERATION) WITHOUT DRAINAGE, 1 OR MORE SESSIONS; PHOTOCOAGULATION (LASER OR XENON ARC)                                                                                                                                                                                                                                                                            |

|       |                                |                                                                                                             |
|-------|--------------------------------|-------------------------------------------------------------------------------------------------------------|
| 67210 | TREATMENT OF<br>RETINAL LESION | DESTRUCTION OF LOCALIZED LESION OF RETINA (EG, MACULAR EDEMA, TUMORS), 1 OR MORE SESSIONS; PHOTOCOAGULATION |
| 67228 | TREATMENT X10SV<br>RETINOPATHY | TREATMENT OF EXTENSIVE OR PROGRESSIVE RETINOPATHY (EG, DIABETIC RETINOPATHY), PHOTOCOAGULATION              |
| 68200 | TREAT EYELID BY<br>INJECTION   | SUBCONJUNCTIVAL INJECTION                                                                                   |
| 68761 | CLOSE TEAR DUCT<br>OPENING     | CLOSURE OF THE LACRIMAL PUNCTUM; BY PLUG, EACH                                                              |
| 69210 | REMOVE IMPACTED<br>EAR WAX UNI | REMOVAL IMPACTED CERUMEN REQUIRING INSTRUMENTATION, UNILATERAL                                              |
| 69220 | CLEAN OUT MASTOID<br>CAVITY    | DEBRIDEMENT, MASTOIDECTOMY CAVITY, SIMPLE (EG, ROUTINE CLEANING)                                            |

**eTable 2. Bivariate Analysis Describing the Association Between Patient, Surgery and Facility Characteristics, and Receipt of Any Preoperative Test Before Cataract Surgery in Fiscal Year 2017.** All variables were eligible to be included in model at  $p < 0.25$ .

| <b>Patient characteristics</b>                     | <b>Odds ratios</b> | <b>P-value</b> |
|----------------------------------------------------|--------------------|----------------|
| <b>Facility surgical complexity</b>                |                    |                |
| Ambulatory advanced                                | Ref.               |                |
| Ambulatory basic                                   | 0.52               | 0.35           |
| Inpatient standard                                 | 0.11               | <0.00          |
| Inpatient intermediate                             | 0.41               | 0.11           |
| Inpatient complex                                  | 0.45               | 0.11           |
| Unknown                                            | 0.45               | 0.28           |
| Facilities annual Cataract surgery volume          | 1.00               | 0.23           |
| Age (per 1 years)                                  | 1.00               | 0.15           |
| Female (vs. male)                                  | 1.08               | 0.11           |
| <b>Race/Ethnicity</b>                              |                    |                |
| Non-Hispanic white                                 | Ref.               |                |
| Asian                                              | 0.93               | <0.00          |
| Black or African American                          | 1.16               | <0.00          |
| Hawaiian                                           | 0.88               | <0.00          |
| American Indian                                    | 1.02               | <0.00          |
| <b>Marital Status</b>                              |                    |                |
| Married                                            | Ref.               |                |
| Single                                             | 0.99               | 0.90           |
| Divorced                                           | 0.96               | <0.01          |
| Widowed                                            | 0.96               | 0.19           |
| Never Married                                      | 1.00               | 0.19           |
| <b>Body Mass Index</b>                             |                    |                |
| Normal (healthy weight)                            | Ref.               |                |
| Low                                                | 0.77               | 0.98           |
| Obese                                              | 0.04               | 1.05           |
| Overweight                                         | 0.61               | 1.01           |
| <b>Elixhauser Index (Individual Comorbidities)</b> |                    |                |
| LX_Congestive_Heart_Failure                        | 1.43               | <0.00          |
| ELX_Cardiac_Arrhythmia                             | 1.38               | <0.00          |
| ELX_Pulmonary_Circulation_Disorders                | 1.53               | <0.00          |
| ELX_Peripheral_Vascular_Disorders                  | 1.21               | <0.00          |
| ELX_Hypertension_Uncomplicated                     | 1.18               | <0.00          |
| ELX_Hypertension_Complicated                       | 1.35               | <0.00          |
| ELX_Paralysis                                      | 1.38               | <0.00          |
| ELX_GRP_Other_Neurological_Disorders               | 1.21               | <0.00          |
| ELX_Chronic_Pulmonary_Disease                      | 1.21               | <0.00          |
| ELX_Diabetes_Uncomplicated                         | 1.16               | <0.00          |
| ELX_Diabetes_Complicated                           | 1.21               | <0.00          |
| ELX_Hypothyroidism                                 | 1.10               | <0.00          |
| ELX_Renal_Failure                                  | 1.41               | <0.00          |
| ELX_Liver_Disease                                  | 1.29               | <0.00          |
| ELX_Peptic_Ulcer_Disease_excluding_bleeding        | 1.29               | <0.00          |
| ELX_AIDS_HIV                                       | 1.23               | <0.00          |
| ELX_Lymphoma                                       | 2.17               | <0.00          |
| ELX_Metastatic_Cancer                              | 2.00               | <0.00          |
| ELX_Solid_Tumor_Without_Metastasis                 | 1.23               | <0.00          |
| ELX_Rheumatoid_Arthritis_collagen                  | 1.21               | <0.00          |

|                                 |      |       |
|---------------------------------|------|-------|
| ELX_Coagulopathy                | 1.53 | <0.00 |
| ELX_Obesity                     | 1.12 | <0.00 |
| ELX_Weight_Loss                 | 1.39 | <0.00 |
| ELX_Fluid_Electrolyte_Disorders | 1.45 | <0.00 |
| ELX_Blood_Loss_Anemia           | 1.64 | <0.00 |
| ELX_Alcohol_Abuse               | 1.14 | <0.00 |
| ELX_Drug_Abuse                  | 1.27 | <0.00 |
| ELX_Psychoses                   | 1.11 | <0.00 |
| ELX_Depression                  | 1.12 | <0.00 |
| <b>Surgery characteristics</b>  |      |       |
| General Anesthesia              | Ref. |       |
| Monitored Anesthesia Care (MAC) | 0.76 | <0.00 |



**eTable 3. Costs Per CPT Code for Laboratory Tests**

CPT Code= Current Procedural Terminology. Total Costs are in dollars and include physician charges and all other charges (i.e., facility charges).

**CPT Code Total Cost (\$)**

|       |         |
|-------|---------|
| 71010 | 94.27   |
| 71015 | 101.61  |
| 71020 | 101.61  |
| 71021 | 111.13  |
| 71022 | 121.42  |
| 71023 | 146.79  |
| 71030 | 121.41  |
| 71034 | 225.64  |
| 71035 | 105.00  |
| 78451 | 1602.51 |
| 78452 | 1756.47 |
| 78453 | 1545.94 |
| 78454 | 1706.75 |
| 78466 | 588.34  |
| 78468 | 689.47  |
| 78469 | 1458.45 |
| 78472 | 637.61  |
| 78473 | 725.31  |
| 78481 | 676.61  |
| 78483 | 774.14  |
| 78494 | 642.62  |
| 78496 | 46.52   |
| 80047 | 11.60   |
| 80048 | 11.60   |
| 80053 | 14.49   |
| 81000 | 4.35    |
| 81001 | 4.35    |
| 81002 | 3.50    |
| 81003 | 3.08    |
| 81005 | 2.97    |
| 81007 | 3.52    |
| 81015 | 4.18    |
| 81020 | 5.06    |
| 82803 | 26.54   |
| 82805 | 38.92   |
| 82810 | 11.97   |
| 85025 | 10.66   |
| 85027 | 8.87    |
| 85345 | 5.91    |
| 85347 | 5.84    |
| 85348 | 5.11    |
| 93000 | 17.59   |
| 93005 | 8.86    |
| 93010 | 8.77    |
| 93015 | 79.19   |
| 93016 | 22.93   |
| 93017 | 40.90   |
| 93018 | 15.29   |
| 93040 | 13.23   |
| 93041 | 5.91    |
| 93042 | 7.28    |
| 93303 | 772.90  |
| 93304 | 660.02  |
| 93306 | 764.09  |
| 93307 | 642.33  |

|       |        |
|-------|--------|
| 93308 | 387.67 |
| 93320 | 56.08  |
| 93321 | 28.32  |
| 93325 | 26.39  |
| 93350 | 784.43 |
| 93351 | 831.04 |
| 93352 | 35.31  |
| 94010 | 37.17  |
| 94060 | 63.27  |
| 94070 | 62.31  |
| 94200 | 26.88  |
| 94250 | 27.61  |
| 94375 | 41.13  |
| 94620 | 58.22  |
| 94621 | 168.79 |
| 94726 | 54.83  |
| 94727 | 43.75  |
| 94729 | 56.70  |
| 94760 | 3.32   |
| 94761 | 4.81   |
| 95070 | 32.14  |
| 95071 | 38.05  |

**eTable 4. Sensitivity Analysis: Mixed-Effects Logistic Regression Model for First Eye Surgery Describing the Association Between Patient, Surgery and Facility Characteristics, and Receipt of Any Preoperative Test Before Cataract Surgery in Fiscal Year 2017.** Model was a surgery level analysis (n=31,444).

| <b>Patient characteristics</b>                    | <b>Odds ratios</b> | <b>Lower Bound (95% CI)</b> | <b>Upper Bound (95%CI)</b> | <b>P-value</b> |
|---------------------------------------------------|--------------------|-----------------------------|----------------------------|----------------|
| <b>Facility surgical complexity</b>               |                    |                             |                            |                |
| Ambulatory advanced                               | 1.00               |                             |                            |                |
| Ambulatory basic                                  | 0.30               | 0.07                        | 1.35                       | 0.12           |
| Inpatient complex                                 | 0.29               | 0.08                        | 0.96                       | 0.04           |
| Inpatient intermediate                            | 0.32               | 0.09                        | 1.17                       | 1.17           |
| Inpatient standard                                | 0.06               | 0.01                        | 0.28                       | 0.00           |
| Unknown                                           | 0.28               | 0.05                        | 1.46                       | 0.13           |
| Facilities annual Cataract surgery volume         | 0.99               | 0.99                        | 1.00                       | 0.23           |
| Age (per 10 years)                                | 1.00               | 0.99                        | 1.00                       | 0.76           |
| Female (vs. male)                                 | 1.03               | 0.91                        | 1.16                       | 0.63           |
| <b>Race/Ethnicity</b>                             |                    |                             |                            |                |
| Non-Hispanic white                                | 1.00               |                             |                            |                |
| Asian                                             | 0.92               | 0.69                        | 1.22                       | 0.58           |
| Black or African American                         | 1.09               | 1.02                        | 1.17                       | 0.01           |
| Hawaiian                                          | 0.79               | 0.62                        | 1.01                       | 0.06           |
| American Indian                                   | 1.15               | 0.90                        | 1.46                       | 0.25           |
| <b>Marital Status</b>                             |                    |                             |                            |                |
| Married                                           | 1.00               |                             |                            |                |
| Single                                            | 1.10               | 0.96                        | 1.25                       | 0.14           |
| Divorced                                          | 0.99               | 0.87                        | 1.14                       | 0.96           |
| Widowed                                           | 0.99               | 0.85                        | 1.16                       | 0.97           |
| Never                                             | 1.06               | 0.92                        | 1.24                       | 0.38           |
| <b>Body Mass Index</b>                            |                    |                             |                            |                |
| Normal (healthy weight) (reference)               | 1.00               |                             |                            |                |
| Low                                               | 0.86               | 0.70                        | 1.06                       | 0.17           |
| Obese                                             | 0.97               | 0.91                        | 1.04                       | 0.47           |
| Overweight                                        | 1.01               | 0.94                        | 1.07                       | 0.72           |
| <b>Elixhauser Index (Number of comorbidities)</b> |                    |                             |                            |                |
|                                                   | 1.08               | 1.06                        | 1.08                       | 0.00           |
| <b>Surgery characteristics</b>                    |                    |                             |                            |                |
| General Anesthesia                                | 1.00               |                             |                            |                |
| Monitored Anesthesia Care (MAC)                   | 0.63               | 0.53                        | 0.76                       | 0.00           |

**eTable 5. Mixed-Effects Logistic Regression Model Describing the Association Between Patient, Surgery and Facility Characteristics, and Receipt of Preoperative Test Bundle Before Cataract Surgery in Fiscal Year 2017.** The Intraclass correlation coefficients (ICCs) were .98 ( $p < 0$ ) at the VHA facility level, .27 ( $p < 0$ ) at the surgeon, and .05 ( $p=0.05$ ) at the patient level.

| Patient characteristics                         | Odds ratios | Lower Bound (95% CI) | Upper Bound (95%CI) | P-value |
|-------------------------------------------------|-------------|----------------------|---------------------|---------|
| <b>Facility surgical complexity</b>             |             |                      |                     |         |
| Ambulatory advanced                             | 1.000       |                      |                     |         |
| Ambulatory basic                                | 6.21        | 6.21                 | >20.00              | 0.86    |
| Inpatient complex                               | 5.35        | 0.00                 | >20.00              | 0.85    |
| Inpatient intermediate                          | 3.20        | 0.00                 | >20.00              | 0.90    |
| Inpatient standard                              | 0.00        | 0.00                 | 0.00                | 0.00    |
| Unknown                                         | 0.27        | 0.00                 | >20.00              | 0.90    |
| Facilities annual Cataract surgery volume       |             |                      |                     |         |
|                                                 | 0.99        | 0.98                 | 1.01                | 0.93    |
| Age (per 10 years)                              | 1.01        | 1.00                 | 1.01                | 0.01    |
| Female (vs. male)                               | 0.99        | 0.84                 | 1.17                | 0.98    |
| <b>Race/Ethnicity</b>                           |             |                      |                     |         |
| Non-Hispanic white                              | 1.000       |                      |                     |         |
| Asian                                           | 0.88        | 0.56                 | 1.38                | 0.58    |
| Black or African American                       | 1.06        | 0.97                 | 1.16                | 0.15    |
| Hawaiian                                        | 0.72        | 0.49                 | 1.06                | 0.10    |
| American Indian                                 | 0.82        | 0.59                 | 1.15                | 0.26    |
| <b>Marital Status</b>                           |             |                      |                     |         |
| Married                                         | 1.000       |                      |                     |         |
| Single                                          | 0.87        | 0.73                 | 1.03                | 0.11    |
| Divorced                                        | 0.30        | 0.77                 | 1.08                | 0.83    |
| Widowed                                         | 0.81        | 0.66                 | 0.98                | 0.03    |
| Never                                           | 0.92        | 0.76                 | 1.12                | 0.43    |
| <b>Body Mass Index</b>                          |             |                      |                     |         |
| Normal (healthy weight)                         | 1.00        |                      |                     |         |
| Low                                             | 0.85        | 0.66                 | 1.11                | 0.24    |
| Obese                                           | 0.97        | 0.89                 | 1.05                | 0.48    |
| Overweight                                      | 0.96        | 0.88                 | 1.04                | 0.40    |
| <b>Elixhauser Index Number of Comorbidities</b> | 1.03        | 1.02                 | 1.05                | 0.00    |
| <b>Surgery characteristics</b>                  |             |                      |                     |         |
| General Anesthesia                              | 1.00        |                      |                     |         |
| Monitored Anesthesia Care                       | 0.64        | 0.53                 | 0.79                | 0.00    |

**eTable 6. Mixed-Effects Poisson Regression Model Describing the Association Between Patient, Surgery and Facility Characteristics, and Number of Preoperative Tests Before Cataract Surgery in Fiscal Year 2017.** The intraclass correlation coefficients (ICC) were .70 ( $p < 0$ ) at the VHA facility level, .42 ( $p < 0$ ) at the surgeon, and .32 ( $p=0$ ) at the patient level.

| Patient characteristics                         | Point Estimate | Lower Bound (95% CI) | Upper Bound (95%CI) | P-value |
|-------------------------------------------------|----------------|----------------------|---------------------|---------|
| <b>Facility surgical complexity</b>             |                |                      |                     |         |
| Ambulatory advanced                             | 1.00           |                      |                     |         |
| Ambulatory basic                                | 0.74           | 0.40                 | 1.34                | 0.43    |
| Inpatient complex                               | 0.68           | 0.37                 | 1.27                | 0.24    |
| Inpatient intermediate                          | 0.68           | 0.35                 | 1.32                | 0.26    |
| Inpatient standard                              | 0.27           | 0.12                 | 0.60                | 0.00    |
| Unknown                                         | 0.61           | 0.26                 | 1.43                | 0.26    |
| Facilities annual Cataract surgery volume       | 1.00           | 1.00                 | 1.00                | 0.12    |
| Age (per 10 years)                              | 1.00           | 1.00                 | 1.00                | 0.52    |
| Female (vs. male)                               | 1.04           | 0.98                 | 1.10                | 0.20    |
| <b>Race/Ethnicity</b>                           |                |                      |                     |         |
| Non-Hispanic white                              | 1.000          |                      |                     |         |
| Asian                                           | 0.95           | 0.82                 | 1.10                | 0.48    |
| Black or African American                       | 1.03           | 1.00                 | 1.07                | 0.03    |
| Hawaiian                                        | 0.90           | 0.80                 | 1.01                | 0.09    |
| American Indian                                 | 1.02           | 0.91                 | 1.14                | 0.74    |
| <b>Marital Status</b>                           |                |                      |                     |         |
| Married                                         | 1.00           |                      |                     |         |
| Single                                          | 0.99           | 0.93                 | 1.05                | 0.72    |
| Divorced                                        | 0.97           | 0.93                 | 1.05                | 0.40    |
| Widowed                                         | 0.96           | 0.90                 | 1.03                | 0.24    |
| <b>Body Mass Index</b>                          |                |                      |                     |         |
| , Normal (healthy weight)                       | 1.00           |                      |                     |         |
| Low                                             | 0.92           | 0.84                 | 1.01                | 0.09    |
| Obese                                           | 0.98           | 0.96                 | 1.01                | 0.25    |
| Overweight                                      | 1.00           | 0.97                 | 1.03                | 0.88    |
| <b>Elixhauser Index Number of Comorbidities</b> | 1.05           | 1.05                 | 1.05                | 0.00    |
| <b>Surgery characteristics</b>                  |                |                      |                     |         |
| General Anesthesia                              | 1.00           |                      |                     |         |
| Monitored Anesthesia Care (MAC)                 | 0.82           | 0.66                 | 0.99                | 0.00    |
